# Supplementary material for: Plasmodium falciparum Sexual Commitment Rate Variation among Clinical Isolates and Diverse Laboratory-Adapted Lines
Source: PubMed Central journal article supplement (PMC9769538; doi:10.1128/spectrum.02234-22), 2022-11-21
Supplement: spectrum.02234-22-s0001.pdf [file spectrum.02234-22-s0001.pdf]

1 **Supplementary Information**

2

3 **Supplementary Table S1.** Gametocyte conversion rate (GCR) estimates (with 95%  
 4 confidence intervals) and all numerical count data for two different methods with multiple  
 5 experimental replicates applied to *P. falciparum* line 3D7/iGP under elevated GDV1  
 6 expression with Shield-1 reagent (+SHLD) and control (-SHLD) conditions.

| Replicate | Condition | Method 1  |          |                       | Method 2          |                   |                       |
|-----------|-----------|-----------|----------|-----------------------|-------------------|-------------------|-----------------------|
|           |           | Pfs16 +ve | DAPI +ve | Pfs16 GCR (95%CI)     | D0 % Parasit.     | D4 % Parasit.     | D0D4 GCR (95% CI)     |
| 1         | -SHLD     | 84        | 921      | 9.12<br>(7.4 - 11.2)  | 10.1<br>(101/999) | 0.3<br>(26/8262)  | 3.4<br>(2.2 - 5.2)    |
|           | +SHLD     | 474       | 826      | 57.4<br>(54.0 - 60.7) | 9.8<br>(98/999)   | 1.9<br>(117/6124) | 20.9<br>(16.0 - 27.3) |
| 2         | -SHLD     | 104       | 1171     | 8.9<br>(7.4 - 10.7)   | 7.2<br>(67/932)   | 0.2<br>(15/8210)  | 2.7<br>(1.6 - 4.7)    |
|           | +SHLD     | 262       | 978      | 26.8<br>(24.1 - 29.7) | 3.0<br>(29/970)   | 0.4<br>(49/13415) | 12.5<br>(7.9 - 19.8)  |
| 3         | -SHLD     | 41        | 926      | 4.4<br>(3.3 - 6.0)    | 5.6<br>(53/946)   | 0.1<br>(8/9305)   | 1.6<br>(2.8 - 3.4)    |
|           | +SHLD     | 150       | 595      | 25.2<br>(21.9 - 28.9) | 4.4<br>(42/957)   | 0.4<br>(36/8625)  | 9.9<br>( 6.3 - 15.4)  |
| 4         | -SHLD     | 47        | 1043     | 4.5<br>(3.4 - 6.0)    | 5.0<br>(48/951)   | 0.4<br>(30/7278)  | 8.5<br>(5.4 - 13.5)   |
|           | +SHLD     | 267       | 701      | 38.1<br>(34.6 - 41.7) | 4.4<br>(42/952)   | 1.0<br>(77/8070)  | 20.1<br>(14.0 - 28.8) |

7

8 **Supplementary Table S2.** Estimates of gametocyte conversion rate (GCR) for 17 assays of  
 9 the *P. falciparum* inducible 3D7/iGP\_D9 line in which two different methods were  
 10 performed in parallel for comparison (as detailed in Materials and Methods). Varying  
 11 concentrations of Shield-1 (0.055 – 1.0  $\mu$ M, and none) were used for the assays. Data are  
 12 plotted and analysed in Figure 2, showing an overall correlation between the methods, with  
 13 Method 1 being generally more sensitive (and more precise with narrower confidence  
 14 intervals as shown here).

| Independent assays of <i>P. falciparum</i> line | Method 1<br>Pfs16 GCR (95%CI) | Method 2<br>D0/D4 GCR (95%CI) |
|-------------------------------------------------|-------------------------------|-------------------------------|
| iGP - SHLD                                      | 9.1 (7.4 - 11.2)              | 3.4 (2.2 - 5.3)               |
| iGP +SHLD (1.0)                                 | 57.4 (54.0 - 60.7)            | 20.9 (16.0 - 27.31)           |
| iGP - SHLD                                      | 8.9 (7.4 - 10.7)              | 2.7 (1.6 - 4.8)               |
| iGP + SHLD (0.055)                              | 14.2 (12.3 - 16.4)            | 4.0 (2.2 - 7.2)               |
| iGP + SHLD (0.15)                               | 16.8 (14.8 - 19.1)            | 2.4 (1.2 (4.9)                |
| iGP + SHLD (0.5)                                | 17.4 (15.3 - 19.7)            | 2.6 (1.3 - 5.2)               |
| iGP +SHLD (1.0)                                 | 26.8 (24.1 - 30.0)            | 12.5 (8.0 - 19.8)             |
| iGP - SHLD                                      | 4.4 (3.4 - 7.0)               | 1.6 (0.8 - 3.4)               |
| iGP + SHLD (0.055)                              | 20.5 (17.9 - 23.4)            | 7.2 (4.6 - 11.3)              |
| iGP + SHLD (0.15)                               | 16.1 (13.8 - 18.7)            | 4.7 (3.2 - 6.9)               |
| iGP + SHLD (0.5)                                | 26.5 (23.5 - 29.6)            | 5.1 (3.2 - 8.2)               |
| iGP +SHLD (1.0)                                 | 25.2 (21.9 - 28.9)            | 9.9 (6.4 - 15.4)              |
| iGP - SHLD                                      | 4.5 (3.4 - 6.9)               | 8.5 (5.4 - 13.5)              |
| iGP + SHLD (0.055)                              | 8.9 (7.2 - 11.2)              | 10.7 (7.3 - 15.7)             |
| iGP + SHLD (0.15)                               | 22.3 (19.2 - 25.8)            | 8.9 (6.1 - 12.8)              |
| iGP + SHLD (0.5)                                | 37.4 (34.0 - 41.0)            | 17.5 (12.9 - 23.8)            |
| iGP +SHLD (1.0)                                 | 38.1 (34.6 - 41.7)            | 20.1 (14.0 - 28.8)            |

15

16 **Supplementary Table S3.** Multiple biological replicate assays of gametocyte conversion  
 17 rates (GCR) for each of 6 cultured *P. falciparum* clinical isolates from Navrongo, Ghana.

| Isolate | Replicate        | RBC Batch | Days in culture | % Parasitaemia Cycle before | % Parasitaemia post-invasion | Parasitaemia fold-change | Pfs16 +ve | DAPI +ve | GCR (95%CI)        |
|---------|------------------|-----------|-----------------|-----------------------------|------------------------------|--------------------------|-----------|----------|--------------------|
| 289     | 1                | 12        | 92              | 1.4                         | 4.4                          | 3.1                      | 38        | 961      | 4.0 (2.9 - 5.4)    |
|         | 2                | 12        | 99              | 0.7                         | 2.8                          | 4.0                      | 9         | 870      | 1.0 (0.6 - 2.0)    |
|         | 3                | 12        | 99              | 0.9                         | 2.9                          | 3.2                      | 23        | 740      | 3.1 (2.1 - 4.6)    |
|         | 4                | 13        | 106             | 0.9                         | 1.8                          | 2.0                      | 53        | 946      | 5.6 (4.3 - 7.3)    |
|         | 5                | 13        | 106             | 0.8                         | 2.1                          | 2.6                      | 28        | 971      | 2.9 (2.0 - 4.1)    |
|         | 6                | 15        | 125             | 0.8                         | 2.4                          | 3.0                      | 28        | 939      | 3.0 (2.1 - 4.3)    |
|         | <i>Mean (SD)</i> |           |                 |                             |                              |                          |           |          | 3.3 (SD = 1.5)     |
| 272     | 1                | 12        | 83              | 1.0                         | 1.0                          | 1.0                      | 48        | 951      | 5.0 (3.8 - 6.6)    |
|         | 2                | 12        | 83              | 0.8                         | 1.9                          | 2.4                      | 45        | 954      | 4.7 (3.5 - 6.3)    |
|         | 3                | 13        | 91              | 1.2                         | 1.5                          | 1.2                      | 34        | 965      | 3.5 (2.5 - 4.9)    |
|         | 4                | 13        | 91              | 0.6                         | 1.2                          | 2.0                      | 26        | 973      | 2.7 (1.8 - 3.9)    |
|         | 5                | 15        | 110             | 0.6                         | 6.3                          | 10.5                     | 69        | 999      | 6.9 (5.5 - 8.7)    |
|         | 6                | 15        | 110             | 0.6                         | 5.5                          | 9.2                      | 51        | 880      | 5.8 (4.4 - 7.5)    |
|         | <i>Mean (SD)</i> |           |                 |                             |                              |                          |           |          | 4.8 (SD = 1.5)     |
| 292     | 1                | 1         | 67              | 0.8                         | 0.8                          | 1                        | 66        | 677      | 9.7 (7.7 - 12.2)   |
|         | 2                | 12        | 62              | 0.9                         | 1.3                          | 1.4                      | 34        | 965      | 3.5 (2.5 - 4.9)    |
|         | 3                | 12        | 62              | 0.7                         | 1.4                          | 2.0                      | 58        | 882      | 6.6 (5.1 - 8.4)    |
|         | 4                | 13        | 69              | 2.3                         | 3.8                          | 1.6                      | 63        | 936      | 6.7 (5.3 - 8.5)    |
|         | 5                | 13        | 69              | 1.1                         | 2.1                          | 1.9                      | 46        | 953      | 4.8 (3.6 - 6.4)    |
|         | 6                | 15        | 88              | 0.5                         | 1.3                          | 2.6                      | 49        | 939      | 5.2 (4.0 - 6.8)    |
|         | 7                | 15        | 88              | 0.8                         | 4.0                          | 5                        | 19        | 564      | 3.4 (2.2 - 5.2)    |
|         | <i>Mean (SD)</i> |           |                 |                             |                              |                          |           |          | 5.7 (SD = 2.2)     |
| 293     | 1                | 1         | 67              | 1.7                         | 1.7                          | 1                        | 109       | 1841     | 5.9 (4.9 - 7.1)    |
|         | 2                | 12        | 55              | 0.8                         | 3.0                          | 3.7                      | 120       | 878      | 13.7 (11.6 - 16.1) |
|         | 3                | 13        | 69              | 0.9                         | 2.1                          | 2.3                      | 118       | 881      | 13.4 (11.3 - 15.8) |
|         | 4                | 13        | 69              | 1.3                         | 2.3                          | 1.8                      | 118       | 883      | 13.4 (11.3 - 15.8) |
|         | 5                | 13        | 76              | 1.0                         | 2.7                          | 2.7                      | 39        | 962      | 4.1 (3.0 - 5.5)    |
|         | 6                | 13        | 76              | 1.0                         | 1.7                          | 1.7                      | 41        | 617      | 6.6 (4.9 - 8.9)    |
|         | <i>Mean (SD)</i> |           |                 |                             |                              |                          |           |          | 9.5 (SD = 4.4)     |
| 296     | 1                | 12        | 48              | 1.5                         | 2.8                          | 1.9                      | 116       | 883      | 13.1 (11.1 - 15.5) |
|         | 2                | 12        | 55              | 1.0                         | 2.5                          | 2.5                      | 31        | 968      | 3.2 (2.3 - 4.5)    |
|         | 3                | 12        | 55              | 0.6                         | 1.3                          | 2.2                      | 65        | 632      | 10.3 (8.2 - 12.9)  |
|         | 4                | 13        | 62              | 1.2                         | 5.4                          | 4.5                      | 94        | 905      | 10.4 (8.6 - 12.5)  |
|         | 5                | 13        | 62              | 1.1                         | 5.0                          | 4.5                      | 84        | 915      | 9.2 (7.5 - 11.2)   |
|         | 6                | 13        | 69              | 1.0                         | 2.6                          | 2.6                      | 93        | 906      | 10.3 (8.5 - 12.4)  |
|         | 7                | 13        | 69              | 1.0                         | 2.9                          | 2.9                      | 118       | 887      | 13.3 (11.2 - 15.7) |
|         | <i>Mean (SD)</i> |           |                 |                             |                              |                          |           |          | 10.0 (SD = 3.4)    |
| 280     | 1                | 1         | 55              | 1.0                         | 1.0                          | 1.0                      | 156       | 1406     | 11.1 (9.6 - 12.9)  |
|         | 2                | 2         | 64              | 2.2                         | 1.5                          | 0.7                      | 103       | 360      | 28.6 (24.2 - 33.5) |
|         | 3                | 2         | 64              | 1.5                         | 2.4                          | 1.6                      | 209       | 794      | 26.3 (23.5 - 29.6) |
|         | 4                | 3         | 71              | 0.7                         | 4.0                          | 5.7                      | 131       | 907      | 14.4 (12.3 - 16.9) |
|         | 5                | 3         | 71              | 1.0                         | 5.0                          | 5.0                      | 109       | 787      | 13.9 (11.6 - 16.4) |
|         | 6                | 3         | 78              | 1.4                         | 4.2                          | 3.0                      | 27        | 973      | 2.8 (1.9 - 4.0)    |
|         | 7                | 3         | 78              | 0.6                         | 2.1                          | 3.5                      | 49        | 884      | 5.5 (4.2 - 7.3)    |
|         | 8                | 4         | 85              | 1.4                         | 3.5                          | 2.5                      | 12        | 998      | 1.2 (0.7 - 2.1)    |
|         | 9                | 4         | 85              | 0.6                         | 5.3                          | 8.8                      | 56        | 943      | 5.9 (4.6 - 7.6)    |
|         | <i>Mean (SD)</i> |           |                 |                             |                              |                          |           |          | 12.2 (SD = 9.8)    |

18 The table shows exact counts and 95% confidence intervals of the GCR estimates using  
 19 Method 1 (with Pfs16 staining) as plotted and analysed in Figure 3 and Table 1. For each

20 replicate assay the number of days the isolate had been in culture after isolation from the  
21 patient is shown, as well as the parasitaemia in the day of the setup of the experiment (cycle  
22 before testing for proportions of gametocytes), the parasitaemia in the cycle during which  
23 the parasites were tested for expression of Pfs16, and the fold change in parasitaemia  
24 between these successive cycles. The assay replicates are presented in the order in which  
25 they were performed (the duration of time in culture occasionally does not exactly follow  
26 the same sequential temporal order for Isolates 292 and 293 as an intermediate  
27 cryopreservation and thawing of the isolates was performed). Erythrocytes from 15 different  
28 erythrocyte donors used at various times throughout the series of experiments shown here  
29 and in Supplementary Table S5 are numbered (RBC Batch), and inspection of the data  
30 indicates that these did not determine the variation between assay replicates.

31

32 **Supplementary Table S4.** Pairwise tests for significant differences in gametocyte conversion  
 33 rates between different Ghanaian *P. falciparum* clinical isolates.

| Clinical Isolates | 272     | 280    | 289      | 292     | 293    | 296 |
|-------------------|---------|--------|----------|---------|--------|-----|
| 272               |         |        |          |         |        |     |
| 280               | 0.1447  |        |          |         |        |     |
| 289               | 0.1797  | 0.0663 |          |         |        |     |
| 292               | 0.5594  | 0.2523 | 0.0350*  |         |        |     |
| 293               | 0.0649  | 0.7756 | 0.0043** | 0.1375  |        |     |
| 296               | 0.0221* | 0.7577 | 0.0047** | 0.0379* | 0.7308 |     |

34

35 P values are from Mann-Whitney comparisons of all of the individual biological replicate  
 36 measures for each of the six isolates (as shown in Supplementary Table S3). Statistically  
 37 significant comparisons are highlighted in green.



|      |             |    |     |     |     |     |      |                    |
|------|-------------|----|-----|-----|-----|-----|------|--------------------|
|      | 1           | 5  | -   | 3.5 | -   | 83  | 920  | 9.0 (7.3 - 11.1)   |
|      | 2           | 5  | -   | 2.5 | -   | 16  | 983  | 1.6 (1.0 - 2.6)    |
|      | 3           | 5  | -   | 2.2 | -   | 6   | 885  | 0.7 (0.3 - 1.5)    |
| D6   | 4           | 9  | 1.7 | 3.5 | 2.1 | 28  | 559  | 5.0 (3.5 - 7.1)    |
|      | 5           | 9  | 1.5 | 2.5 | 1.7 | 86  | 905  | 9.5 (7.8 - 11.6)   |
|      | 6           | 9  | 1.0 | 0.1 | 0.1 | 26  | 973  | 2.7 (1.8 - 3.9)    |
|      | 7           | 9  | 1.4 | 0.7 | 0.5 | 50  | 950  | 5.3 (4.0 - 6.9)    |
|      | <i>Mean</i> |    |     |     |     |     |      | 4.70               |
|      | 1           | 6  | 1.4 | 3.3 | 2.4 | 22  | 978  | 2.2 (1.5 - 3.4)    |
|      | 2           | 6  | 0.8 | 1.5 | 1.9 | 85  | 914  | 9.3 (7.6 - 11.4)   |
|      | 3           | 6  | 2.5 | 1.5 | 0.6 | 92  | 917  | 10.0 (8.3 - 12.2)  |
| GB4  | 4           | 6  | 1.2 | 1.0 | 0.8 | 37  | 964  | 3.8 (2.8 - 5.3)    |
|      | 5           | 7  | 0.9 | 7.7 | 8.6 | 59  | 940  | 6.3 (4.9 - 8.0)    |
|      | 6           | 7  | 1.4 | 3.6 | 2.6 | 16  | 983  | 1.6 (1.0 - 2.6)    |
|      | 7           | 9  | 0.9 | 2.2 | 3.7 | 34  | 969  | 3.5 (2.5 - 4.9)    |
|      | <i>Mean</i> |    |     |     |     |     |      | 5.26               |
|      | 1           | 2  | 0.9 | 3.7 | 4.1 | 130 | 902  | 14.4 (12.3 - 16.9) |
|      | 2           | 3  | 1.5 | 1.9 | 1.6 | 4   | 995  | 0.4 (0.2 - 1.0)    |
|      | 3           | 3  | 1.6 | 3.0 | 1.9 | 9   | 986  | 0.9 (0.5 - 1.7)    |
| Dd2  | 4           | 4  | -   | 1.1 | -   | 46  | 953  | 4.8 (3.6 - 6.4)    |
|      | 5           | 4  | -   | 2.6 | -   | 84  | 916  | 9.2 (7.5 - 11.2)   |
|      | 6           | 12 | -   | 3.6 | -   | 23  | 532  | 4.3 (2.9 - 6.4)    |
|      | 7           | 12 | -   | 2.1 | -   | 35  | 885  | 4.0 (2.9 - 5.5)    |
|      | <i>Mean</i> |    |     |     |     |     |      | 5.42               |
|      | 1           | 2  | -   | 9.2 | -   | 50  | 691  | 7.2 (5.5 - 9.4)    |
|      | 2           | 2  | -   | 5.0 | -   | 103 | 1000 | 10.3 (8.6 - 12.3)  |
| HB3  | 3           | 9  | 3.4 | 4.5 | 1.3 | 57  | 942  | 6.1 (4.7 - 7.8)    |
|      | 4           | 9  | 0.9 | 7.5 | 8.3 | 56  | 944  | 5.9 (4.6 - 7.6)    |
|      | <i>Mean</i> |    |     |     |     |     |      | 6.87               |
|      | 1           | 2  | -   | 2.3 | -   | 225 | 1022 | 22.0 (19.6 - 24.7) |
|      | 2           | 2  | -   | 3.7 | -   | 182 | 1013 | 18.0 (15.7 - 20.5) |
|      | 3           | 3  | -   | 6.8 | -   | 73  | 926  | 7.9 (6.3 - 9.8)    |
| NF54 | 4           | 3  | -   | 6.2 | -   | 54  | 925  | 5.8 (4.5 - 7.5)    |
|      | 5           | 13 | -   | 1.1 | -   | 41  | 619  | 6.6 (4.9 - 8.9)    |
|      | 6           | 13 | -   | 8.4 | -   | 11  | 975  | 1.1 (0.6 - 2.0)    |
|      | 7           | 13 | -   | 8.8 | -   | 27  | 975  | 2.8 (1.9 - 4.0)    |
|      | <i>Mean</i> |    |     |     |     |     |      | 9.18               |

|      |             |    |     |     |     |     |     |                    |
|------|-------------|----|-----|-----|-----|-----|-----|--------------------|
| RO33 | 1           | 5  | -   | 2.7 | -   | 153 | 861 | 17.8 (15.4 - 20.5) |
|      | 2           | 5  | -   | 1.1 | -   | 68  | 943 | 7.2 (5.7 - 9.0)    |
|      | 3           | 7  | 1.3 | 1.1 | 0.8 | 70  | 932 | 7.5 (6.0 - 9.4)    |
|      | 4           | 7  | 2.4 | 0.7 | 0.3 | 92  | 910 | 10.1 (8.3 - 12.2)  |
|      | 5           | 10 | -   | 4.0 | -   | 72  | 921 | 7.8 (6.3 - 9.7)    |
|      | 6           | 10 | 1.4 | 3.6 | 2.6 | 124 | 875 | 14.2 (12.0 - 16.6) |
|      | <i>Mean</i> |    |     |     |     |     |     | 10.77              |
| FCC2 | 1           | 5  | 2.1 | 4.3 | 2.0 | 211 | 785 | 26.9 (23.9 - 30.1) |
|      | 4           | 5  | 2.5 | 3.9 | 1.6 | 147 | 835 | 17.6 (15.2 - 20.3) |
|      | 5           | 5  | 1.1 | 4.8 | 4.4 | 16  | 484 | 3.3 (2.0 - 5.3)    |
|      | 6           | 5  | 0.8 | 3.0 | 3.8 | 23  | 503 | 4.6 (3.1 - 6.8)    |
|      | 7           | 10 | -   | 4.8 | -   | 69  | 935 | 7.4 (5.9 - 9.2)    |
|      | 8           | 10 | -   | 9.1 | -   | 47  | 952 | 4.9 (3.7 - 6.5)    |
|      | <i>Mean</i> |    |     |     |     |     |     | 10.78              |
| 7G8  | 1           | 6  | 2.1 | 3.2 | 2.7 | 159 | 856 | 18.6 (16.1 - 21.3) |
|      | 2           | 6  | 1.2 | 2.5 | 2.1 | 199 | 803 | 24.8 (21.9 - 27.9) |
|      | 3           | 10 | 0.7 | 1.5 | 2.1 | 135 | 452 | 29.9 (25.8 - 34.2) |
|      | 4           | 10 | 1.9 | 0.9 | 1.7 | 24  | 339 | 7.1 (4.8 - 10.3)   |
|      | 5           | 10 | 2.2 | 2.6 | 1.2 | 9   | 456 | 2.0 (1.0 - 3.7)    |
|      | 6           | 11 | 1.5 | 2.2 | 1.5 | 46  | 953 | 4.8 (3.6 - 6.4)    |
|      | <i>Mean</i> |    |     |     |     |     |     | 14.52              |

41 Exact counts and 95% confidence intervals of the GCR estimates were performed using  
 42 Method 1 (with Pfs16 staining) as plotted and analysed in Figure 4. The parasitaemia in the  
 43 day of the setup of each assay (cycle before testing for proportions of gametocytes) is  
 44 shown, along with the parasitaemia in the cycle during which the parasites were tested for  
 45 expression of Pfs16, and the fold change in parasitaemia between these successive cycles,  
 46 except for missing values for some replicates. Erythrocytes from fifteen different  
 47 erythrocyte donors used at various times throughout the series of experiments shown here  
 48 and in Supplementary Table S3 are numbered (RBC Batch), and inspection of the data shows  
 49 that these did not determine the variation between assay replicates.

50



51 **Supplementary Table S6.** Pairwise tests for significant differences in gametocyte conversion rates between different *P. falciparum* laboratory  
 52 lines. P values are from Mann-Whitney comparisons of all of the individual biological replicate measures for each of the 13 lines (as shown in  
 53 Supplementary Table S5). Statistically significant comparisons are highlighted in green.

| Lab Isolates | F12      | D10       | T9/96    | Palo Alto | 3D7      | D6      | GB4     | Dd2    | HB3    | NF54   | RO33    | 7G8    | FCC2 |
|--------------|----------|-----------|----------|-----------|----------|---------|---------|--------|--------|--------|---------|--------|------|
| F12          |          |           |          |           |          |         |         |        |        |        |         |        |      |
| D10          | 0.0047** |           |          |           |          |         |         |        |        |        |         |        |      |
| T9/96        | 0.0022** | 0.1696    |          |           |          |         |         |        |        |        |         |        |      |
| Palo Alto    | 0.0022** | 0.2459    | 0.6082   |           |          |         |         |        |        |        |         |        |      |
| 3D7          | 0.0012** | 0.0017**  | 0.0052** | 0.1521    |          |         |         |        |        |        |         |        |      |
| D6           | 0.0012** | 0.0012**  | 0.0023** | 0.0216*   | 0.0781   |         |         |        |        |        |         |        |      |
| GB4          | 0.0012** | 0.0006*** | 0.0012** | 0.0047**  | 0.0117*  | 0.6457  |         |        |        |        |         |        |      |
| Dd2          | 0.0012** | 0.0012**  | 0.0047** | 0.0338*   | 0.1282   | >0.9999 | >0.9999 |        |        |        |         |        |      |
| HB3          | 0.0048** | 0.0030**  | 0.0095** | 0.0061**  | 0.0012** | 0.2303  | 0.4121  | 0.3124 |        |        |         |        |      |
| NF54         | 0.0012** | 0.0006*** | 0.0012** | 0.0082**  | 0.0175*  | 0.3176  | 0.535   | 0.3176 | 0.9273 |        |         |        |      |
| RO33         | 0.0022** | 0.0012**  | 0.0022** | 0.0022**  | 0.0012** | 0.035*  | 0.035*  | 0.0734 | 0.026* | 0.4452 |         |        |      |
| 7G8          | 0.0022** | 0.0012**  | 0.0022** | 0.0043**  | 0.0082** | 0.1807  | 0.1807  | 0.1101 | 0.3939 | 0.4452 | >0.9999 |        |      |
| FCC2         | 0.0022** | 0.0012**  | 0.0022** | 0.0022**  | 0.0012** | 0.336   | 0.2949  | 0.2343 | 0.9143 | 0.9452 | 0.3939  | 0.6991 |      |

54

55

**Supplementary Table S7.** Numerical counts and calculated values of assays measuring the effect of choline-free medium on gametocyte conversion rates (GCR) of five different *P. falciparum* lines. The effect on GCR within each biological replicate assay is shown as a Rate Ratio with 95% confidence intervals, based on the GCR (proportions of parasites expressing Pfs16) with and without choline. Mantel-Haenszel adjusted mean Rate Ratios show the overall effects across all replicates with 95% confidence intervals.

| Replicate Assays                     | Condition | % Parasitaemia cycle before | % Parasitaemia Post invasion | Fold-change | Pfs16 +ve | Pfs16 -ve | Rate Ratio ( $\pm$ 95%CI) | GCR ( $\pm$ 95%CI) | Adjusted mean Rate Ratio ( $\pm$ 95%CI) |
|--------------------------------------|-----------|-----------------------------|------------------------------|-------------|-----------|-----------|---------------------------|--------------------|-----------------------------------------|
| <b><i>P. falciparum</i> line HB3</b> |           |                             |                              |             |           |           |                           |                    |                                         |
| R1                                   | -choline  |                             | 3.4                          | 1.2         | 16        | 967       | 2.03                      | 1.6 (1.0 - 2.6)    | <b>1.98<br/>(1.55 - 2.52)</b>           |
|                                      | + choline | 2.8                         | 3.5                          | 1.3         | 7         | 864       | (0.93 - 5.46)             | 0.8 (0.4 - 1.6)    |                                         |
| R2                                   | -choline  |                             | 9.7                          | 12          | 29        | 943       | 3.69                      | 3.0 (2.1 - 4.3)    |                                         |
|                                      | + choline | 0.8                         | 8.8                          | 11          | 8         | 983       | (1.69 - 8.04)             | 0.8 (0.4 - 1.6)    |                                         |
| R3                                   | -choline  |                             | -                            | -           | 34        | 902       | 12.05                     | 3.6 (2.6 - 5.0)    |                                         |
|                                      | + choline | 0.9                         | -                            | -           | 3         | 993       | (3.71 - 39.13)            | 0.3 (0.1 - 0.9)    |                                         |
| R4                                   | -choline  |                             | 7.4                          | 5.3         | 36        | 929       | 2.01                      | 3.7 (2.7 - 5.1)    |                                         |
|                                      | + choline | 1.4                         | 4.1                          | 2.9         | 18        | 950       | (1.15 - 3.51)             | 1.9 (1.2 - 2.9)    |                                         |
| R5                                   | -choline  |                             | 5.4                          | 9.0         | 24        | 954       | 1.26                      | 2.5 (1.7 - 3.6)    |                                         |
|                                      | + choline | 0.6                         | 9.0                          | 15          | 19        | 961       | (0.70 - 2.30)             | 1.9 (1.2 - 3.0)    |                                         |
| R6                                   | -choline  |                             | 8.6                          | 14          | 14        | 970       | 1.00                      | 1.4 (0.8 - 2.4)    |                                         |
|                                      | + choline | 0.6                         | 10.0                         | 17          | 14        | 971       | (0.48 - 2.09)             | 1.4 (0.8 - 2.4)    |                                         |
| R7                                   | -choline  |                             | 2.8                          | 4.7         | 20        | 959       | 0.95                      | 2.0 (1.3 - 3.1)    |                                         |
|                                      | + choline | 0.6                         | 1.9                          | 3.2         | 21        | 957       | (0.52 - 1.74)             | 2.1 (1.4 - 3.3)    |                                         |
| R8                                   | -choline  |                             | 4.7                          | -           | 19        | 962       | 2.40                      | 1.9 (1.2-3.0)      |                                         |
|                                      | + choline | -                           | 5.2                          | -           | 8         | 983       | 1.06 - 5.45)              | 0.8 (0.4 - 1.6)    |                                         |
| <b><i>P. falciparum</i> line Dd2</b> |           |                             |                              |             |           |           |                           |                    |                                         |
| R1                                   | -choline  |                             | 2.5                          | 2.5         | 194       | 619       | 5.58                      | 23.9 (21.1 - 26.9) | <b>3.51<br/>(3.00 - 4.11)</b>           |
|                                      | + choline | 1.0                         | 3.2                          | 3.2         | 41        | 917       | (4.03 - 7.71)             | 4.3 (3.2 - 5.8)    |                                         |
| R2                                   | -choline  |                             | 5.1                          | 6.4         | 42        | 1867      | 0.95                      | 2.2 (1.6 - 3.0)    |                                         |
|                                      | + choline | 0.8                         | 1.9                          | 2.4         | 37        | 1562      | (0.61 - 1.47)             | 2.31 (1.7 - 3.2)   |                                         |
| R3                                   | -choline  |                             | 3.8                          | 1.8         | 51        | 912       | 1.21                      | 5.3 (4.1 - 6.9)    |                                         |
|                                      | + choline | 2.1                         | 2.3                          | 1.1         | 42        | 915       | (0.81 - 1.80)             | 4.4 (3.3- 5.9)     |                                         |
| R4                                   | -choline  |                             | 7.8                          | 6.0         | 105       | 799       | 16.56                     | 11.6 (9.7 - 13.9)  |                                         |
|                                      | + choline | 1.3                         | 7.9                          | 6.1         | 7         | 991       | (7.75 - 35.40)            | 0.7 (0.3 - 1.4)    |                                         |
| R5                                   | -choline  |                             | 6.4                          | 4.3         | 141       | 847       | 12.82                     | 14.3 (12.2 - 16.6) |                                         |
|                                      | + choline | 1.5                         | 12.5                         | 8.3         | 11        | 977       | (6.98 - 23.53)            | 1.1 (0.6 - 2.0)    |                                         |
| R6                                   | -choline  |                             | 9.7                          | -           | 93        | 824       | 2.07                      | 10.1 (8.4 - 12.3)  |                                         |
|                                      | + choline | -                           | 9.5                          | -           | 47        | 910       | (1.47 - 2.90)             | 4.9 (3.7 - 6.5)    |                                         |

| <b><i>P. falciparum</i> line 3D7</b>   |           |     |     |     |    |      |                        |                 |                               |
|----------------------------------------|-----------|-----|-----|-----|----|------|------------------------|-----------------|-------------------------------|
| R1                                     | -choline  |     | 10  | 3.6 | 17 | 965  |                        | 1.7(1.1 - 2.8)  |                               |
|                                        | + choline | 2.8 | 2.6 | 0.9 | 14 | 969  | 1.22<br>(0.60 - 2.45)  | 1.4 (0.9 - 2.4) |                               |
| R2                                     | -choline  |     | 8.5 | 11  | 1  | 997  |                        | 0.1 (0.0 - 0.6) |                               |
|                                        | + choline | 0.8 | 8.6 | 11  | 5  | 989  | 0.20<br>(0.02- 1.70)   | 0.5 (0.2 - 1.2) |                               |
| R3                                     | -choline  |     | -   | -   | 6  | 987  |                        | 0.6 (0.3 -1.3)  |                               |
|                                        | + choline | 0.9 | -   | -   | 2  | 995  | 3.01<br>(0.61 - 14.88) | 0.2 (0.0 - 0.7) |                               |
| R4                                     | -choline  |     | -   | -   | 34 | 931  |                        | 3.5 (2.5 - 4.9) |                               |
|                                        | + choline | 1.4 | -   | -   | 10 | 970  | 3.45<br>(1.72 - 6.95)  | 1.0 (0.6 - 1.9) |                               |
| R5                                     | -choline  |     | 4.5 | 7.5 | 4  | 940  |                        | 0.4 (0.2 - 1.1) | <b>1.50<br/>(1.16 - 1.94)</b> |
|                                        | + choline | 0.6 | 4.4 | 7.3 | 5  | 961  | 0.82<br>(0.22 - 3.04)  | 0.5 (0.2 - 1.2) |                               |
| R6                                     | -choline  |     | 9.5 | 16  | 6  | 987  |                        | 0.6 (0.3 - 1.3) |                               |
|                                        | + choline | 0.6 | 8.8 | 15  | 9  | 961  | 0.65<br>(0.23 - 1.82)  | 0.9 (0.5 - 1.8) |                               |
| R7                                     | -choline  |     | -   | -   | 35 | 931  |                        | 3.6 (2.6 - 5.0) |                               |
|                                        | + choline | 0.6 | -   | -   | 19 | 961  | 1.86<br>(1.08 - 3.24)  | 1.9 (1.2 -3.0)  |                               |
| R8                                     | -choline  |     | 5.3 | -   | 43 | 913  |                        | 4.5 (3.4 - 6.0) |                               |
|                                        | + choline | -   | 4.0 | -   | 34 | 938  | 1.28<br>(0.83 - 1.99)  | 3.5 (2.5 - 4.8) |                               |
| <b><i>P. falciparum</i> line T9/96</b> |           |     |     |     |    |      |                        |                 |                               |
| R1                                     | -choline  |     | 9.6 | 4.4 | 7  | 985  |                        | 0.7 (0.3 - 1.4) |                               |
|                                        | + choline | 2.2 | 2.2 | 1.0 | 7  | 985  | 1.00<br>(0.35 - 2.84)  | 0.7 (0.3 - 1.4) |                               |
| R2                                     | -choline  |     | 8.4 | 5.6 | 2  | 995  |                        | 0.2 (0.0 - 0.7) |                               |
|                                        | + choline | 1.5 | 8.6 | 5.7 | 4  | 1131 | 0.57<br>(0.10 - 3.10)  | 0.4 (0.1 - 0.9) |                               |
| R3                                     | -choline  |     | 8.1 | 3.7 | 2  | 995  |                        | 0.2 (0.0 - 0.7) |                               |
|                                        | + choline | 2.2 | 7.2 | 3.3 | 0  | 999  | no estimate            | 0 (0)           |                               |
| R4                                     | -choline  |     | -   | -   | 2  | 934  |                        | 0.2 (0.0 - 0.8) | <b>0.8<br/>(0.51 - 1.19)</b>  |
|                                        | + choline | 0.6 | -   | -   | 8  | 983  | 0.26<br>(0.06 - 1.24)  | 0.8 (0.4 - 1.6) |                               |
| R5                                     | -choline  |     | -   | -   | 5  | 643  |                        | 0.8 (0.3 - 1.8) |                               |
|                                        | + choline | 0.6 | -   | -   | 4  | 429  | 0.83<br>(0.23 - 3.09)  | 0.9 (0.4 - 2.4) |                               |
| R6                                     | -choline  |     | 4.3 | -   | 11 | 978  |                        | 1.1 (0.6 - 2.0) |                               |
|                                        | + choline | -   | 4.8 | -   | 13 | 973  | 0.84<br>(0.38 - 1.88)  | 1.3 (0.8 - 2.2) |                               |
| R7                                     | -choline  |     | 2.7 | -   | 9  | 739  |                        | 1.2 (0.6 - 2.3) |                               |
|                                        | + choline | -   | 1.6 | -   | 12 | 780  | 0.79<br>(0.34 - 1.87)  | 1.5 (0.9 -2.6)  |                               |

---

| <i>P.falciparum</i> line NF54 |           |     |      |     |    |     |                |                 |
|-------------------------------|-----------|-----|------|-----|----|-----|----------------|-----------------|
| R1                            | -choline  | -   | 3.7  | -   | 27 | 945 | 2.50           | 2.8 (1.9 - 4.0) |
|                               | + choline | -   | 12.7 | -   | 11 | 978 | (1.25 - 5.01)  | 1.1 (0.6 - 2.0) |
| R2                            | -choline  | -   | 6.6  | -   | 30 | 943 | 5.11           | 3.1 (2.2- 4.4)  |
|                               | + choline | -   | 6.8  | -   | 6  | 990 | (2.13 - 12.24) | 0.6 (0.3 - 1.3) |
| R3                            | -choline  | 1.5 | 5.1  | 3.4 | 40 | 819 | 3.53           | 4.7 (3.4- 6.3)  |
|                               | + choline | 1.5 | 4.0  | 2.7 | 13 | 973 | (1.90 - 6.56)  | 1.3 (0.8 - 2.2) |
| R4                            | -choline  | 1.0 | 4.5  | 4.6 | 43 | 913 | 5.57           | 4.5 (3.4 - 6.0) |
|                               | + choline | 1.0 | 10.6 | 11  | 8  | 983 | (2.63 - 11.79) | 0.8 (0.4 - 1.6) |
| R5                            | -choline  | 0.4 | 4.3  | 11  | 70 | 861 | 1.52           | 7.5 (6.0 - 9.4) |
|                               | + choline | 0.4 | 5.0  | 13  | 47 | 905 | (1.06 - 2.18)  | 4.9 (3.7 - 6.5) |
| R6                            | -choline  | 0.7 | 5.6  | 8.0 | 60 | 880 | 1.86           | 6.4 (5.0 - 8.1) |
|                               | + choline | 0.7 | 2.1  | 3.0 | 33 | 933 | (1.23 - 2.83)  | 3.4 (2.4 - 4.8) |
| R7                            | -choline  | 1.0 | 3.9  | 3.9 | 8  | 983 | 1.60           | 0.8 (0.4 - 1.6) |
|                               | + choline | 1.0 | 1.6  | 1.6 | 5  | 986 | (0.53 - 4.87)  | 0.5 (0.2 - 1.2) |
| R8                            | -choline  | 0.6 | 2.5  | 4.2 | 15 | 970 | 5.06           | 1.5 (0.9 - 2.5) |
|                               | + choline | 0.6 | 4.0  | 6.7 | 3  | 993 | (1.47 - 17.41) | 0.3 (0.1 - 0.9) |

---

**2.41**  
**(1.97 - 2.96)**
